# Supplementary material
Source: Springer Nature journal article supplement (https://www.springermedizin.de/resource/supplementary/12889_2014_7165_MOESM2_ESM.docx/9496918)
Supplement: MOESM2 [file 9496918]

**Figure 1. Flow diagram of the number of records identified, included and excluded**

Records identified through database searching
(n = 7108)

Additional records identified through other sources
(n = 63)

Records screened
(n = 7171 )

Studies included in qualitative synthesis
(n = 36)

**Flow diagram adapted from: Preferred Reporting Items for Systematic Reviews and Meta-Analyses:**

**The PRISMA Statement. [26]**

Full-text articles assessed for eligibility
(n = 432)

## **Identification**

## **Eligibility**

## **Screening**

## **Included**

Records after duplicates removed
(n = 7171)

Full-text articles excluded, with reasons
(n = 396)

Records excluded
(n = 6739)
